# Supplementary material
Source: PubMed Central journal article supplement (PMC1693698)

AAA2

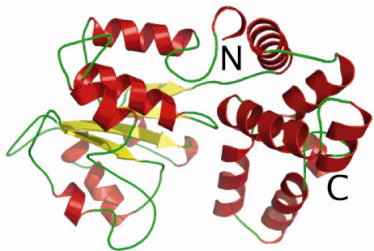

AAA3

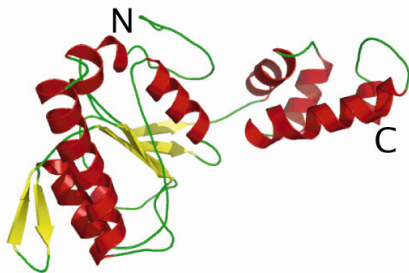

AAA4

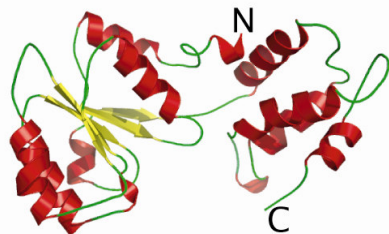

AAA5

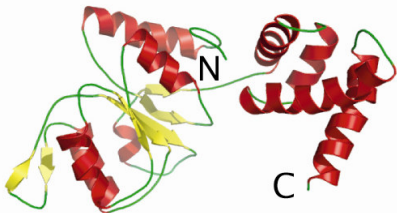

AAA6

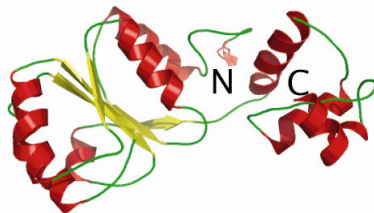

Supplement: pnas_0602867103_1.pdf [file pnas_0602867103_1.pdf]

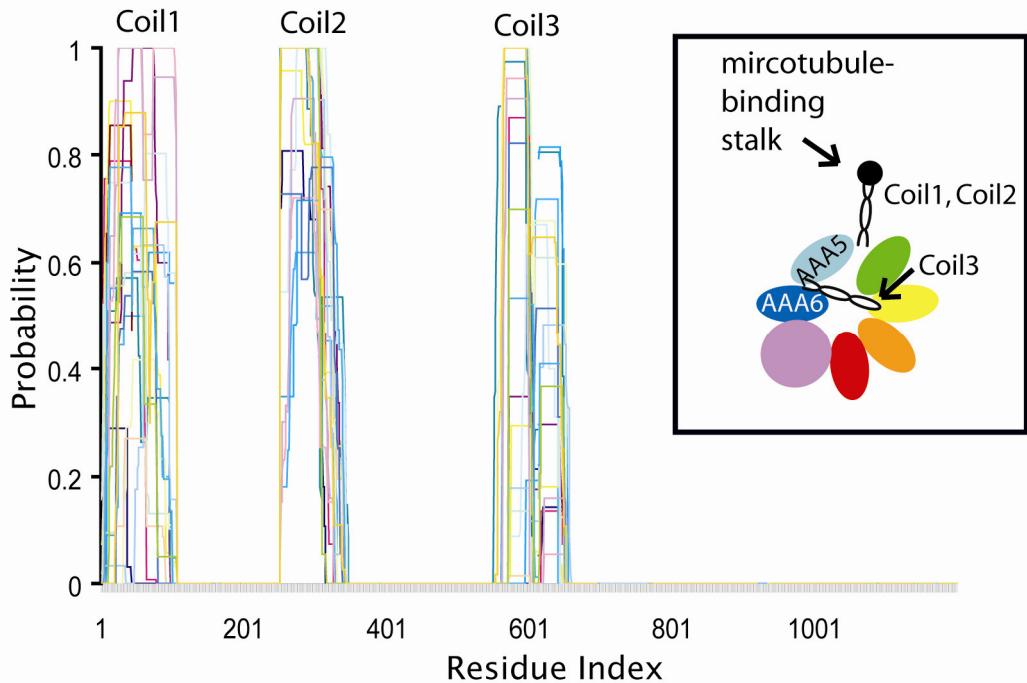

Supplement: pnas_0602867103_2.pdf [file pnas_0602867103_2.pdf]
